# Supplementary material
Source: PubMed Central journal article supplement (PMC2872267)
Supplement: mmc1.pdf [file mmc1.pdf]

Biophysical Journal, Volume 98

**Supporting Material**

**Sequence determinants of compaction in intrinsically disordered proteins**

Joseph A. Marsh and Julie D. Forman-Kay

*Supporting Material for*  
*'Sequence determinants of compaction in intrinsically disordered proteins'*

**Table S1.** List of intrinsically disordered proteins with  $R_h$  measurements.

| Name                           | # of residues | $R_h$ | pH  | Reference | Sequence                                                                                                                                                                                                                                         |
|--------------------------------|---------------|-------|-----|-----------|--------------------------------------------------------------------------------------------------------------------------------------------------------------------------------------------------------------------------------------------------|
| <b>A. PFG-NMR measurements</b> |               |       |     |           |                                                                                                                                                                                                                                                  |
| Abeta(1-40)                    | 40            | 14.36 | 7.4 | (1)       | DAEFRHDSGYEVHHQKLVFFAEDVGSNKGAIIGLMVGGVV                                                                                                                                                                                                         |
| SBD                            | 61            | 25.6  | 6   | (2)       | GSMMSASSQSPNPNNAEYECSTIPPLEYECSTIPPLQQAQASGALSSPPPTVMVPVGVVKHP                                                                                                                                                                                   |
| CTL9-I98A                      | 92            | 21.7  | 6.6 | (3)       | AAEELANAKLKEQLEKLTVTIPAKAGEGGRFLFGSITSKQAAESLQAQHGLKLDKRKIELADAIRALGYTNVPVKLHPEVTATLKVHVTEQK                                                                                                                                                     |
| Hdm2-ABD                       | 97            | 25.7  | 6   | (4)       | XXSSSESTGTSPNPDLDAGVSEHSGDWLDQDSVSDQFVSEFEVESLDSSEYSLSEEGQELSDDEDDEVYQVTVYQAGESDTDSFEEDPEISLADYWK                                                                                                                                                |
| Sm1                            | 105           | 23.4  | 7   | (5)       | MQNSQDYFYAQNRCQQQAPSTLRTVTMAEFRRVPLPMAEVPMLSTQNSMGSSASASASLEMWEKDLEERLNSIDHDMNNNKFGSGELKSMFNQGGKVEEMDF                                                                                                                                           |
| prothymosin alpha              | 110           | 33.7  | 7   | (6)       | MSDAAVDTTSEITTKDLKEKKEVVEEAENGRDAPANGNANEENGEQEADNEVDEEEEGGEEEEEEEGDGEEEDGDEDEEAESATGKRAAEDDEDDDDVDTKKQKTDEDD                                                                                                                                    |
| TC1                            | 112           | 26.5  | 5   | (7)       | HHHHHHMKAKRSHQAIMSTSLRVSPSIHGYHFDTASRKKA VGNIFENTDQESLERLFRNSGDKKAEERAKIIFAIQDVVEEKTRALMALKKRRTKDKLFQFLKLRKYSIKVH                                                                                                                                |
| alpha-synuclein                | 140           | 28.2  | 7.4 | (8)       | MDVFMKGLSKAKEGVVAAAEKTKQGVAEAAGKTKEGVLVYVGSKTKEGVVHG VATVAEKTKEQVTNVGGAVVTGVTAVAQKTVEGAGSIAAATGFVKDKQLGKNEEGAPQEGILEDMPVDPDNEAYEMPSEEGYQDYEPA                                                                                                    |
| CFTR R region                  | 189           | 32    | 6.8 | (9)       | GAMESAERRNSILTETLHRFSLEGDAPVSWTETKKQSFKQTGEFGEKRNKNSILNPINSIRKFSIVQKTPLQMNGIEEDSDEPLERRLSLVPDSEQGEAILPRISVISTGPTLQARRRQSVLNLMTHSVNVQGGNIHRKTTASTRKVSLAPQANLTELDIYSRRLSQTGLEISEEINEEDLKECLFDDME                                                   |
| Tau K45                        | 198           | 45    | 6.5 | (10)      | MSSPGSPGTPGSRSRTPSLPTPPTREPCKVAVVRTPPKSPSSAKSRLQTA PVPMPDLKNVKSKIGSTENLKHQPGGGKVQIINKKLDLSNVQSKCGSKDNKIHVPGGGSVQIVYKPVDLKVTSKCGSLGNIHHKPGGGQVEVKSEKLDKFDKRVQSKIGSLDNITHVPGGGNKKIETHKLTFRENAKAKTDHGAEIVY                                          |
| RYBP                           | 234           | 39.5  | 7   | (11)      | HHHHHHMTMGDKKSPTRPKRQAKPAADEGFWDGCSVCTFRNSAEAFKCSICDVRKGTSTRKPRNSQLVAQQAQYATPPPPKKEKKEKVEKQDKEKPEKDKEISPSVTCKNTNKKTKPKSDILKDPPEANSIQSANATTKTSETNHTSRPRLKNVDRSTAQQLAVTVGNVTVIITDFKEKTRSSSTSSSTVTSSAGSEQNQSSSGSESTDKGSSRSSTPKGDMSAVNDESF           |
| 3D7-6H MSP2                    | 237           | 34.3  | 7   | (12)      | MIKNESKYSNTFINNAYNMSIRRSMAESKPSTGAGGSAAGGSAGGSAGGSAGGSAGGSAGSGDNGADAEGSSSTPATTTTTTKTTTTTTTTNDAEASTSTSENPNHKNAETNPKGKGEVQEPNQANKETQNNNSNVQQDSQTKSNVPPTQDADTKSPTAQPEQAENSAPTAEQTESPELQSA PENKGTGQHGHMHGSRNNHPQNTSDSQKECTDGNKENC GAATSLLNSSNNHHHHHH |
| <b>B. SEC measurements</b>     |               |       |     |           |                                                                                                                                                                                                                                                  |
| EHD-L16A                       | 61            | 20.1  | 7   | (13)      | TNDEKRPRTA FSSSEQAARLKREFNENRYLTERRRQQLSELGLNEAQIKIWFQNKRAKIKK                                                                                                                                                                                   |
| p53-TAD                        | 73            | 23.8  | 7.5 | (14)      | MEEPQSDPSVEPPLSQETFSDLWKLLPENNVLSPPLSQA MDDLMLSPDDIEQWFTEDPGPDEAPRMP EAAAPRV                                                                                                                                                                     |
| p57-ID                         | 73            | 24    | 7   | (15)      | XXTSACRSLFGPVDHEELSRELQARLAELNAEDQNRWDYDFQQDMPLRGPGRQLQWTEVDSVSPAFYRETQV                                                                                                                                                                         |

|                   |     |       |     |      |                                                                                                                                                                                                                                      |
|-------------------|-----|-------|-----|------|--------------------------------------------------------------------------------------------------------------------------------------------------------------------------------------------------------------------------------------|
| PDE-gamma         | 87  | 24.8  | 7.5 | (16) | MNLEPPKAEIRSATRVMGGPVTPRKGPPKFKQRQTRQF<br>KSKPPKGVQFGDDIPGMEGLTDITVICPWEAFNHL<br>ELHELAQYGI                                                                                                                                          |
| Vmw65             | 89  | 28    | 8   | (17) | GSAGHTRRLSTAPPTDVSGLDELHLDGEDVAMAHADA<br>LDDFDLMDLGDGDSPPGFTPHDSAPYGALDMADFEF<br>EQMFTDALGIDEYGG                                                                                                                                     |
| LJIDP1            | 94  | 24.52 | 7   | (18) | MARSFTNIKAISALVAEEFSNSLARRGYAATAQSAGRV<br>GASMSGKMGSTKSGEKAAREKVSVPDPVTGYK<br>PENIKEIDVAELRSVAVLGKN                                                                                                                                  |
| Mlph(147-<br>240) | 97  | 28    | 7.5 | (19) | XXXGGGGSEPSLEEINGDSEQTDEDGDLDEARDQPL<br>NSKKKRLLSFRDVFEEEDSHLVQPCSTLGLSSVPE<br>SAHSLQSLSGEPYSEDTSLEP                                                                                                                                 |
| TyrRS(D1)         | 107 | 21    | 7   | (20) | MALFSGDIANLTAEEIEQGFKDVPFSVHEGGDVLVEL<br>LVSAGISPSKRQAREDIQNGAIYNGERLQDVGAILTAE<br>HRLGRFTVIRRGKKKYLYRYALEHHHHHH                                                                                                                     |
| ASR1              | 115 | 27.4  | 7   | (21) | MEEKHHHHHHLFHHKDKAEEGPVDYKEIKHHKHLE<br>QIGKLTVAAGAYALHEKHEAKKDPEHAHKHKIEEEI<br>AAAAAVGAGGFAPHEHHEKDKAKKEKKLRGDTTIS<br>SKLLF                                                                                                          |
| Nup116            | 126 | 25.2  | 6.8 | (22) | GSRRASVSGSALFGAKPASGGLFGQSAGSKAFGMNTN<br>PTGTTGGLFGQTNQQSGGGLFGQQNSNAGGLFGQN<br>NQSQNQSLFGQQNSNAFGQPQQGGLFGSKPAGGL<br>FGQQGASTHHHHHH                                                                                                 |
| Cad136            | 136 | 28.1  | 7   | (23) | RLEQYTSAVVGNKAAPAKPAASDLVPAEGVRNIKS<br>MWEKGNVFSSPGGTGTPNKETAGLKVGVSSRINEWLT<br>KTPEGNKSPAPKPSDLRPGDVSGRNLWEKQSVKPA<br>ASSKVATATGKKSETNGLRQFEKEP                                                                                     |
| NTAIL             | 139 | 27    | 7   | (24) | MRGSHHHHHHXXXHTTEDKISRAVGRQAQVSFLHG<br>DQSENELPRLGGKEDRRVKQSRGEARESYRETGPSRAS<br>DARAAHLPTGTPLDIDTASESSQDPQDSRRSADALLRL<br>QAMAGISEEQGSDTDTPIVYNDNRLLD                                                                               |
| NL3-cyt           | 140 | 28.3  | 8.5 | (25) | MGSSHHHHHSSGLVPRGSHMAYRKDKRRQEPLRQPS<br>PQRGAGAPELGAAPPEELAAALQLGPTHHECEAGPPHDT<br>LRLTALPDYTLTLRRSPDDIPLMTPNTITMIPNSLVGLQ<br>TLHPYNTFAAGFNSTGLPHSHSTTRV                                                                             |
| ShB-C             | 146 | 32.9  | 8   | (26) | MXXGQHMKKSSLSESSDMMDLDDGVSTPGLTETHP<br>GRSAVAPFLGAQQQQQPVASSLSMSIDKQLQHPLQQ<br>LTQTQLYQQQQQQQQQNGFKQQQQTQQQLQQ<br>QSHTINASAAAATSGSGSGLTMRHNNALAVSIETDV                                                                               |
| Fos-AD            | 168 | 35    | 7   | (27) | GSHMSVASLDLTGGLPEVATPESEEAFPLPLNDPEPKP<br>SVEPVKSISSELMELKTEPFDDFLPASSRPSGSETARSVPD<br>MDLSGSFYAADWEPLHSGSLGMGPMATELEPLCTPVV<br>TCTPSCTAYTSSVFVTYPEADSFPSCAAHRKGSSSNEP<br>SSDSLSSPTLLAL                                              |
| HIF1-alpha<br>530 | 170 | 38.3  | 7.2 | (28) | XEFKLELVEKLEAEDTEAKNPFSTQDLDLEMLAPYI<br>PMDDDFQLRSFDQLSPLESSASPEASQSTVTVFQQT<br>QIQEPTANATTTTATDELKTVTKDRMEDIKILIASPST<br>HIHKETTSSPYRDTQSRTASPNRAGKGVIEQTEKSH<br>PRSPNVLSVALSQR                                                     |
| HIF1-alpha<br>403 | 202 | 44.3  | 7.2 | (28) | XAAGDTIISLDFGSNDTETDDQGLEEVPLYNDVMLPSP<br>NEKLQININLAMSPLPTAETPKPLRSSADPALNQEVALK<br>LEPNPESLELSFTMPQIQDQTPSPSDGSTRQSSPEPNSP<br>EYCFYVDSDMVNEFKLELVEKLEAEDTEAKNPFSTQD<br>TDLDEMLAPYIPMDDDFQLRSFDQLSPLESSASPEA<br>SPQSTVTVFQ          |
| Securin           | 204 | 39.7  | 7.2 | (29) | XXMATLIYVDKENGEPGTRVVAKDGLKLGSGPSIKAL<br>DGRSQVSTPRFGKTFDAPPALPKATRKALGTVNRAKTEK<br>SVKTKGPKLKQKQPSFSAKKMTEKTVKAKSSVPASDDA<br>YPEIEKFFPFNPLDFESFDLPEEHQIAHLPLSGVPLMILD<br>EERELEKLFQLGPPSPVKMPSPPWESNLLQSPSSILSTLD<br>VELPPVCCDIDI   |
| Gliotactin        | 215 | 33.4  | 7.4 | (30) | XXXXMWRNKRQSDRFYDEDVFINGEGLEPEQDTRG<br>VDNAHMVNTNHHALRSRDNIEYRDSPTKTLASKAHT<br>DTTSLRSPSLAMTQKSSSQASLKSGLKTNHGLVKQ<br>SERAATPRSQQNGSTAKVASPPVEEKRLQLSSTPVT<br>QLQAEPARKRVPTAASVSGSSRSTTPVPSARSTTTHTTA<br>TLSSQPAQAQPRRTHLVEGVPHHHHHH |
| Mlph(147-         | 260 | 49    | 7.5 | (19) | XXXGGGGSEPSLEEINGDSEQTDEDGDLDEARDQPL<br>NSKKKRLLSFRDVFEEEDSHLVQPCSTLGLSSVPE                                                                                                                                                          |

|      |  |  |  |  |                                                                                                                                                                                                        |
|------|--|--|--|--|--------------------------------------------------------------------------------------------------------------------------------------------------------------------------------------------------------|
| 403) |  |  |  |  | SAHSLQSLSGEPYSEDTTSLPEGLEETGARALGCRPSP<br>EVQPCSPPLPSGEDAHAELSPAASCKSAFGTTAMPGTD<br>DVRGKHLPSQYLADVDTSEDSIQGPRAASQHSKRRA<br>RTVPETQILELNKRMSAVEHLLVHLENTVLPPSAQEPT<br>VETHPSADTEEETLRRRLEELTSNIGSSTSSE |
|------|--|--|--|--|--------------------------------------------------------------------------------------------------------------------------------------------------------------------------------------------------------|

**Table S2.** List of folded proteins with  $R_h$  measurements.

| <b>Name</b>                         | <b># of residues</b> | <b><math>R_h</math></b> | <b>Reference</b> |
|-------------------------------------|----------------------|-------------------------|------------------|
| bovine pancreatic trypsin inhibitor | 58                   | 15.8                    | (31)             |
| SH3 domain of PI3 kinase            | 90                   | 18.6                    | (31)             |
| horse heart cytochrome c            | 104                  | 17.8                    | (31)             |
| hen lysozyme                        | 129                  | 20.5                    | (31)             |
| horse myoglobin                     | 153                  | 21.2                    | (31)             |
| bovine alpha-lactalbumin            | 123                  | 18.8                    | (31)             |
| bovine pancreatic ribonuclease A    | 124                  | 19                      | (31)             |
| sperm whale apomyoglobin            | 153                  | 20.9                    | (31)             |
| ubiquitin                           | 76                   | 16.5                    | (32)             |
| (apo)cytochrome C                   | 104                  | 18.5                    | (32)             |
| alpha-lactalbumin                   | 123                  | 18.5                    | (32)             |
| tumor suppressor, p16               | 156                  | 20                      | (32)             |
| (apo)myoglobin                      | 154                  | 20.9                    | (32)             |
| beta-lactoglobulin                  | 162                  | 22                      | (32)             |
| sarcoplasmic calcium binding        | 174                  | 21.5                    | (32)             |
| adenylate kinase                    | 194                  | 21.9                    | (32)             |
| tryptophan synthase                 | 268                  | 24.2                    | (32)             |
| beta-lactamase                      | 257                  | 23.7                    | (32)             |
| carbonic anhydrase B                | 260                  | 23.3                    | (32)             |
| RTEM beta-lactamase                 | 263                  | 24.5                    | (32)             |

**Table S3.** List of chemically denatured proteins with  $R_h$  measurements.

| <b>Name</b>                                          | <b># of residues</b> | <b><math>R_h</math></b> | <b>Reference</b> |
|------------------------------------------------------|----------------------|-------------------------|------------------|
| lysozyme(49-64), 8 M urea, pH 2                      | 16                   | 10.4                    | (31)             |
| D3(17-37), 8 M urea                                  | 22                   | 13.3                    | (31)             |
| D3(2-38), 8 M urea                                   | 32                   | 15.5                    | (31)             |
| PI3 SH3, 3.5 M GdnHCl                                | 90                   | 27.5                    | (31)             |
| lysozyme, 8 M urea, pH 2, reduced                    | 129                  | 34.6                    | (31)             |
| triosephosphate isomerase, 2.5 GdnHCl                | 247                  | 49.7                    | (31)             |
| reduced bovine pancreatic ribonuclease A, 6 M GdnHCl | 124                  | 31.4                    | (31)             |
| ubiquitin, 8 M urea                                  | 76                   | 24.6                    | (32)             |
| ribonuclease A, 8 M urea                             | 124                  | 32.4                    | (32)             |
| lysozyme, 8 M urea                                   | 129                  | 33.1                    | (32)             |
| myoglobin, 8 M urea                                  | 153                  | 35.1                    | (32)             |
| beta-lactoglobulin, 8 M urea                         | 162                  | 37.8                    | (32)             |
| chymotrypsinogen, 8 M urea                           | 245                  | 45                      | (32)             |
| carbonic anhydrase B, 8 M urea                       | 260                  | 47.8                    | (32)             |
| beta-lactamase, 8 M urea                             | 257                  | 48.9                    | (32)             |
| albetin, 6 M GdnHCl                                  | 73                   | 24.7                    | (32)             |
| beta-lactamase, 6 M GdnHCl                           | 257                  | 52                      | (32)             |
| carbonic anhydrase B, 8 M urea                       | 260                  | 52                      | (32)             |
| ubiquitin, 6 M GdnHCl                                | 76                   | 25.8                    | (32)             |
| prothymosin alpha, 6 M GdnHCl                        | 110                  | 31.4                    | (32)             |
| ribonuclease A, 6 M GdnHCl                           | 124                  | 32.8                    | (32)             |
| alpha-lactalbumin, 6 M GdnHCl                        | 123                  | 31.8                    | (32)             |
| alpha-synuclein, 6 M GdnHCl                          | 140                  | 34.3                    | (32)             |
| tumor suppressor, p16, 6 M GdnHCl                    | 156                  | 37.1                    | (32)             |
| dihydrofolate reductase, 6 M GdnHCl                  | 158                  | 37.6                    | (32)             |
| beta-lactoglobulin, 6 M GdnHCl                       | 162                  | 37                      | (32)             |
| adenyate kinase, 6 M GdnHCl                          | 193                  | 42.1                    | (32)             |

## References

1. Danielsson, J., J. Jarvet, P. Damberg, and A. Graslund. 2002. Translational diffusion measured by PFG-NMR on full length and fragments of the Alzheimer's Abeta(1-40) peptide. *Magn Reson Chem* 40:S89-97.
2. Chong, P. A., B. Ozdamar, J. L. Wrana, and J. D. Forman-Kay. 2004. Disorder in a target for the smad2 mad homology 2 domain and its implications for binding and specificity. *J Biol Chem* 279:40707-40714.
3. Li, Y., B. Shan, and D. P. Raleigh. 2007. The cold denatured state is compact but expands at low temperatures: hydrodynamic properties of the cold denatured state of the C-terminal domain of L9. *J Mol Biol* 368:256-262.
4. Sivakolundu, S. G., A. Nourse, S. Moshiach, B. Bothner, C. Ashley, J. Satumba, J. Lahti, and R. W. Kriwacki. 2008. Intrinsically unstructured domains of Arf and Hdm2 form bimolecular oligomeric structures in vitro and in vivo. *J Mol Biol* 384:240-254.
5. Danielsson, J., L. Liljedahl, E. Barany-Wallje, P. Sonderby, L. H. Kristensen, M. A. Martinez-Yamout, H. J. Dyson, P. E. Wright, F. M. Poulsen, L. Maler, A. Graslund, and B. B. Kragelund. 2008. The intrinsically disordered RNR inhibitor Sml1 is a dynamic dimer. *Biochemistry* 47:13428-13437.
6. Yi, S., B. L. Boys, A. Brickenden, L. Konermann, and W.-Y. Choy. 2007. Effects of zinc binding on the structure and dynamics of the intrinsically disordered protein prothymosin alpha: evidence for metalation as an entropic switch *Biochemistry* 46:13120-13130.
7. Gall, C., H. Xu, A. Brickenden, X. Ai, and W. Y. Choy. 2007. The intrinsically disordered TC-1 interacts with Chibby via regions with high helical propensity. *Protein Sci* 16:2510-2518.
8. Paleologou, K. E., A. W. Schmid, C. C. Rospigliosi, H.-Y. Kim, G. R. Lamberto, R. A. Fredenburg, P. T. Lansbury, C. O. Fernandez, D. Eliezer, M. Zweckstetter, and H. A. Lashuel. 2008. Phosphorylation at Ser-129 but not the phosphomimics S129E/D inhibits the fibrillation of alpha-synuclein. *J Biol Chem* 283:16895-16905.
9. Baker, J. M. R. 2009. Structural Characterization and Interactions of the CFTR Regulatory Region (PhD Thesis). Department of Biochemistry. University of Toronto, Toronto.
10. Soragni, A., B. Zambelli, M. D. Mukrasch, J. Biernat, S. Jeganathan, C. Griesinger, S. Ciurli, E. Mandelkow, and M. Zweckstetter. 2008. Structural characterization of binding of Cu(II) to tau protein. *Biochemistry* 47:10841-10851.
11. Neira, J. L., M. Roman-Trufero, L. M. Contreras, J. Prieto, G. Singh, F. N. Barrera, M. L. Renart, and M. Vidal. 2009. The transcriptional repressor RYBP is a natively unfolded protein which folds upon binding to DNA. *Biochemistry* 48:1348-1360.
12. Zhang, X., M. A. Perugini, S. Yao, C. G. Adda, V. J. Murphy, A. Low, R. F. Anders, and R. S. Norton. 2008. Solution conformation, backbone dynamics and lipid interactions of the intrinsically unstructured malaria surface protein MSP2. *J Mol Biol* 379:105-121.
13. Mayor, U., J. G. Grossmann, N. W. Foster, S. M. Freund, and A. R. Fersht. 2003. The denatured state of Engrailed Homeodomain under denaturing and native conditions. *J Mol Biol* 333:977-991.
14. Lowry, D. F., A. Stancik, R. M. Shrestha, and G. W. Daughdrill. 2008. Modeling the accessible conformations of the intrinsically unstructured transactivation domain of p53. *Proteins* 71:587-598.
15. Adkins, J. N., and K. J. Lumb. 2002. Intrinsic structural disorder and sequence features of the cell cycle inhibitor p57Kip2. *Proteins* 46:1-7.
16. Uversky, V. N., S. E. Permyakov, V. E. Zagranichny, I. L. Rodionov, A. L. Fink, A. M. Cherskaya, and E. A. Permyakov. 2002. Effect of zinc and temperature on the conformation of the gamma subunit of retinal phosphodiesterase: a natively unfolded protein. *Journal of Proteome Research* 1:149-159.

17. Donaldson, L., and J. P. Capone. 1992. Purification and characterization of the carboxyl-terminal transactivation domain of Vmw65 from herpes simplex virus type 1. *J Biol Chem* 267:1411-1414.
18. Haaning, S., S. Radutoiu, S. Hoffmann, J. Dittmer, L. Giehm, D. E. Otzen, and J. Stougaard. 2008. An unusual intrinsically disordered protein from the model legume *Lotus japonicus* stabilizes proteins in vitro. *J Biol Chem* 283:31142-31152.
19. Geething, N. C., and J. A. Spudich. 2007. Identification of a minimal myosin Va binding site within an intrinsically unstructured domain of melanophilin. *J Biol Chem* 282:21518-21528.
20. Guez, V., S. Nair, A. Chaffotte, and H. Bedouelle. 2000. The anticodon-binding domain of tyrosyl-tRNA synthetase: state of folding and origin of the crystallographic disorder. *Biochemistry* 39:1739-1747.
21. Goldgur, Y., S. Rom, R. Ghirlando, D. Shkolnik, N. Shadrin, Z. Konrad, and D. Bar-Zvi. 2007. Desiccation and zinc binding induce transition of tomato abscisic acid stress ripening 1, a water stress- and salt stress-regulated plant-specific protein, from unfolded to folded state. *Plant Physiol* 143:617-628.
22. Krishnan, V. V., E. Y. Lau, J. Yamada, D. P. Denning, S. S. Patel, M. E. Colvin, and M. F. Rexach. 2008. Intramolecular cohesion of coils mediated by phenylalanine-glycine motifs in the natively unfolded domain of a nucleoporin. *PLoS Comput Biol* 4:e1000145.
23. Permyakov, S. E., I. S. Millett, S. Doniach, E. A. Permyakov, and V. N. Uversky. 2003. Natively unfolded C-terminal domain of caldesmon remains substantially unstructured after the effective binding to calmodulin. *Proteins* 53:855-864.
24. Longhi, S., V. Receveur-Brechot, D. Karlin, K. Johansson, H. Darbon, D. Bhella, R. Yeo, S. Finet, and B. Canard. 2003. The C-terminal domain of the measles virus nucleoprotein is intrinsically disordered and folds upon binding to the C-terminal moiety of the phosphoprotein. *J Biol Chem* 278:18638-18648.
25. Paz, A., T. Zeev-Ben-Mordehai, M. Lundqvist, E. Sherman, E. Mylonas, L. Weiner, G. Haran, D. I. Svergun, F. A. Mulder, J. L. Sussman, and I. Silman. 2008. Biophysical characterization of the unstructured cytoplasmic domain of the human neuronal adhesion protein neuroligin 3. *Biophys J* 95:1928-1944.
26. Magidovich, E., I. Orr, D. Fass, U. Abdu, and O. Yifrach. 2007. Intrinsic disorder in the C-terminal domain of the Shaker voltage-activated K<sup>+</sup> channel modulates its interaction with scaffold proteins. *Proc Natl Acad Sci U S A* 104:13022-13027.
27. Campbell, K. M., A. R. Terrell, P. J. Laybourn, and K. J. Lumb. 2000. Intrinsic structural disorder of the C-terminal activation domain from the bZIP transcription factor Fos. *Biochemistry* 39:2708-2713.
28. Sanchez-Puig, N., D. B. Veprintsev, and A. R. Fersht. 2005. Binding of natively unfolded HIF-1 $\alpha$  ODD domain to p53. *Mol Cell* 17:11-21.
29. Sanchez-Puig, N., D. B. Veprintsev, and A. R. Fersht. 2005. Human full-length Securin is a natively unfolded protein. *Protein Sci* 14:1410-1418.
30. Zeev-Ben-Mordehai, T., E. H. Rydberg, A. Solomon, L. Toker, V. J. Auld, I. Silman, S. Botti, and J. L. Sussman. 2003. The intracellular domain of the *Drosophila* cholinesterase-like neural adhesion protein, gliotactin, is natively unfolded. *Proteins* 53:758-767.
31. Wilkins, D. K., S. B. Grimshaw, V. Receveur, C. M. Dobson, J. A. Jones, and L. J. Smith. 1999. Hydrodynamic radii of native and denatured proteins measured by pulse field gradient NMR techniques. *Biochemistry* 38:16424-16431.
32. Tcherkasskaya, O., E. A. Davidson, and V. N. Uversky. 2003. Biophysical constraints for protein structure prediction. *J Proteome Res* 2:37-42.
